# Supplementary material for: Long-term dynamics of measles in London: Titrating the impact of wars, the 1918 pandemic, and vaccination
Source: PLoS Comput Biol. 2019 Sep 12;15(9):e1007305. doi: 10.1371/journal.pcbi.1007305 (PMC6742223; doi:10.1371/journal.pcbi.1007305)
Supplement: S1 Data — (CSV) [file pcbi.1007305.s007.csv]

	Year	Births	Pop	Vax
1	1893	128368.4211	4449039.636	0
2	1894	128368.4211	4449039.636	0
3	1895	128368.4211	4449039.636	0
4	1896	128368.4211	4449039.636	0
5	1897	130927.4575	4449039.636	0
6	1898	132407	4540195	0
7	1899	133574	4540139.571	0
8	1900	131872	4570851	0
9	1901	131135	4831341.143	0
10	1902	128961	4520448	0
11	1903	129579	4468702	0
12	1904	125953	4377090	0
13	1905	122778	4402303	0
14	1906	117559	4338573	0
15	1907	122213	4536429	0
16	1908	121622	4536429	0
17	1909	114487	4536267	0
18	1910	116450	4536267	0
19	1911	110549	4521301	0
20	1912	111915	4546650.909	0
21	1913	111474	4519185.636	0
22	1914	110938	4518098.273	0
23	1915	103700	4516996.273	0
24	1916	101597	4516612	0
25	1917	83466	4303426.091	0
26	1918	72736	4179981.727	0
27	1919	81979	4177541	0
28	1920	122540	4358309	0
29	1921	102218	4531971	0
30	1922	94782	4514405	0
31	1923	91662	4534230	0
32	1924	85147	4564109	0
33	1925	82401	4576505	0
34	1926	78825	4602000	0
35	1927	73263	4605400	0
36	1928	72352	4541000	0
37	1929	70090	4458200	0
38	1930	69449	4417900	0
39	1931	65684	4374300	0
40	1932	67371	4230200	0
41	1933	62608	4230200	0
42	1934	56853	4230200	0
43	1935	63145	4230200	0
44	1936	64540	4185200	0
45	1937	55011	4185200	0
46	1938	64325	4141100	0
47	1939	52366	4013400	0
48	1940	46213	3084100	0
49	1941	33380	2320100	0
50	1942	40806	2405000	0
51	1943	45032	2500600	0
52	1944	44851	2462500	0
53	1945	45840	2601370	0
54	1946	66023	3109240	0
55	1947	70685	3245000	0
56	1948	60805	3339100	0
57	1949	56547	3375470	0
58	1950	53660	3389620	0
59	1951	52387	3358000	0
60	1952	51443	3363000	0
61	1953	50992	3343000	0
62	1954	50745	3322000	0
63	1955	49826	3295000	0
64	1956	52171	3273000	0
65	1957	52733	3253880	0
66	1958	54152	3225000	0
67	1959	55191	3204000	0
68	1960	57368	3194480	0
69	1961	60052	3179980	0
70	1962	62524	3185770	0
71	1963	63500	3178870	0
72	1964	63500	3184600	0
73	1965	60902	3160380	0
74	1966	59247	3140800	0
75	1967	55326	3118630	0
76	1968	51156	3020410	44612.53741
77	1969	46733	2981580	24179.01599
78	1970	43789	2926000	37532.20271
79	1971	41600	2751380	30594.99241
80	1972	36980	2700320	28581.28574
81	1973	33667	2650230	25830.45923
82	1974	32091	2583400	18772.23758
83	1975	30300	2553500	16405.87588
84	1976	29376	2494600	16768.03101
85	1977	29087	2476200	16040.13532
86	1978	30412	2446600	16248.67073
87	1979	32039	2428100	17093.09019
88	1980	33348	2416100	18001.21548
89	1981	33213	2381700	18469.10324
90	1982	33096	2314100	19020.1167
91	1983	33373	2309700	19017.62127
92	1984	33792	2315300	21149.12524
93	1985	34988	2322400	22997.56764
94	1986	35519	2328200	24392.0848
95	1987	36444	2318500	24929.28965
96	1988	37365	2308800	48039.3774
97	1989	37694	2320100	66795.0711
98	1990	38605	2337500	51343.74737
99	1991	38627	2354500	NA
100	1992	38643	2416100	NA
101	1993	38643	2416100	NA
102	1994	38643	2416100	NA
